# Supplementary material
Source: MDPI journal article supplement (https://www.mdpi.com/2227-7102/8/1/25)
Supplement: s1 [file s1]

2

|                                      |                                                                                                                                                                                       |                                                                                                                       |                                                                                                                                               |          |
|--------------------------------------|---------------------------------------------------------------------------------------------------------------------------------------------------------------------------------------|-----------------------------------------------------------------------------------------------------------------------|-----------------------------------------------------------------------------------------------------------------------------------------------|----------|
| Background of the groups members     |                                                                                                                                                                                       |                                                                                                                       |                                                                                                                                               |          |
| Gamification Conceptualization       |                                                                                                                                                                                       |                                                                                                                       |                                                                                                                                               |          |
| Game Element                         | Description                                                                                                                                                                           | Do we use it? (Y/N)                                                                                                   | How do we use it?                                                                                                                             | Response |
| 1. Empowerment                       | Enable user to perceive that he/she can impact on the situation, have a sense of control                                                                                              |                                                                                                                       | What are the decisions an empowered learner can take?                                                                                         |          |
| 2. Smooth Learning Curves            | it keeps the user in continuous learning progress and in mastering his/hel skills                                                                                                     |                                                                                                                       | How can we smoothen learning curves for different learners?                                                                                   |          |
| 3. Communication Channels            | it enables communication via chats, forum, etc part of the game in which all players' actions take place until a certain goal has been reached or an end condition has been fulfilled |                                                                                                                       | Which communication channels are specifically needed?                                                                                         |          |
| 4. Levels                            | hints given to users to solve a problem and/or to achieve a goal and unblock the next level                                                                                           |                                                                                                                       | How do we distinguish different levels? What is specific for each level?                                                                      |          |
| 5. Clues                             | Are indicators that explicit the goals                                                                                                                                                |                                                                                                                       | How do we balance clues (not too many, not too few, informative without giving away too much information)?                                    |          |
| 6. Goal Indicators                   | Enable custom configurations of a character's abilities, often                                                                                                                        |                                                                                                                       | Which goals can be selected/defined?                                                                                                          |          |
| 7. Skills tree                       | organised in branches associations of players who chose to come together to achieve a common goal                                                                                     |                                                                                                                       | Which skills can we distinguish? How can we organise them in a hierarchy?                                                                     |          |
| 8. Guild                             | the act of telling stories within the game                                                                                                                                            |                                                                                                                       | How can learners team up in guilds? What is the goal of each guild? How does it compete with other guilds?                                    |          |
| 9. Storytelling                      | enable users to plan future action or goals therfore the strategy to follow to complete a level or the game itself                                                                    |                                                                                                                       | Which story do we want to tell?                                                                                                               |          |
| 10. Stimulated Planning              |                                                                                                                                                                                       |                                                                                                                       | In a flipped MOOC how do you forseen the implementation of Stimulated Planning, a game elements that invite the users to plan their strategy? |          |
| Learning Analytics conceptualization |                                                                                                                                                                                       |                                                                                                                       |                                                                                                                                               |          |
| For each game element selected:      |                                                                                                                                                                                       | Why do we use it?<br>For who?<br>How do we use it?/ how do you implement it?<br>What data do we need to support that? |                                                                                                                                               |          |
| Design Phase                         |                                                                                                                                                                                       |                                                                                                                       |                                                                                                                                               |          |
| Domain                               |                                                                                                                                                                                       |                                                                                                                       |                                                                                                                                               |          |
| Topic                                |                                                                                                                                                                                       |                                                                                                                       |                                                                                                                                               |          |
| Target group in mind                 |                                                                                                                                                                                       |                                                                                                                       |                                                                                                                                               |          |
