# Supplementary material
Source: MDPI journal article supplement (https://www.mdpi.com/2227-7102/8/1/25)
Supplement: s1 [file s1]

|                                      |                                                                                                  |                                                           |                                                       |                                                 |
|--------------------------------------|--------------------------------------------------------------------------------------------------|-----------------------------------------------------------|-------------------------------------------------------|-------------------------------------------------|
| Group name                           | Dissertation Writing Preparation / Research Methods                                              | <a href="https://goo.gl/Bk2g5u">https://goo.gl/Bk2g5u</a> |                                                       |                                                 |
| Background of the groups members     | Senior Lecturer & Technology Advisor                                                             |                                                           |                                                       |                                                 |
| Gamification Conceptualization       |                                                                                                  |                                                           |                                                       |                                                 |
| Game Element                         | Description                                                                                      | Do we use it? (Y/N)                                       | How do we use it?                                     | Response                                        |
| 1. Empowerment                       | Empowered users or players can influence their experience and situation, have a sense of control |                                                           | How can the experience an empowered learner can take? |                                                 |
| 2. Smooth Learning Curves            | mastering his/her skills                                                                         | Yes                                                       | different learners?                                   | of each section. Evaluation at the end          |
| 3. Communication Channels            | it enables communication via chats, forum, etc                                                   |                                                           | specifically needed?                                  |                                                 |
| 4. Levels                            | until a                                                                                          | Yes                                                       | What is specific for each level?                      | Metaphor baking a cake . Ingredients with badge |
| 5. Clues                             | goal and unblock the next level                                                                  |                                                           | not too few, informative without giving away          |                                                 |
| 6. Goal Indicators                   | Are indicators that explicit the goals                                                           | Yes                                                       | Which goals can be selected/defined?                  | one is achieved by the end of each session. At  |
| 7. Skills tree                       | often                                                                                            |                                                           | we organise them in a hierarchy?                      |                                                 |
| 8. Guild                             | achieve a                                                                                        | Yes                                                       | is the goal of each guild? How does it                | Group by subject. Forum discussion              |
| 9. Storytelling                      | the act of telling stories within the game                                                       |                                                           | Which story do we want to tell?                       |                                                 |
| 10. Stimulated Planning              | strategy to follow to complete a level or the game itself                                        |                                                           | implementation of Stimulated Planning, a              |                                                 |
| Learning Analytics conceptualization |                                                                                                  |                                                           |                                                       |                                                 |
| For each game element selected:      |                                                                                                  | Why do we use it?                                         |                                                       |                                                 |
|                                      |                                                                                                  | For who?                                                  |                                                       |                                                 |
|                                      |                                                                                                  | How do we use it?/ how do you implement it?               |                                                       |                                                 |
|                                      |                                                                                                  | What data do we need to support that?                     |                                                       |                                                 |
| Design Phase                         |                                                                                                  |                                                           |                                                       |                                                 |
| Domain                               | Dissertation                                                                                     |                                                           |                                                       |                                                 |
| Topic                                | writing support                                                                                  |                                                           |                                                       |                                                 |
| Target group in mind                 | undergrad / post grad                                                                            |                                                           |                                                       |                                                 |

|                   |          |                                             |                                       |
|-------------------|----------|---------------------------------------------|---------------------------------------|
| Why do we use it? | For who? | How do we use it?/ how do you implement it? | What data do we need to support that? |
|-------------------|----------|---------------------------------------------|---------------------------------------|
