# Supplementary material
Source: MDPI journal article supplement (https://www.mdpi.com/2227-7102/8/1/25)
Supplement: s1 [file s1]

|                                      |                                                                                                                     |                                                                                                                                                                   |                                                                                                                                               |                                                                                                                                                                                                                                                                       |
|--------------------------------------|---------------------------------------------------------------------------------------------------------------------|-------------------------------------------------------------------------------------------------------------------------------------------------------------------|-----------------------------------------------------------------------------------------------------------------------------------------------|-----------------------------------------------------------------------------------------------------------------------------------------------------------------------------------------------------------------------------------------------------------------------|
| Background of the groups members     |                                                                                                                     | 2<br>Group 1 : all of us have an education and technology background, 3 of us have been directly involved in MOOC design, 2 of us have knowledge of gamification. | <a href="https://goo.gl/Bk2g5u">https://goo.gl/Bk2g5u</a>                                                                                     |                                                                                                                                                                                                                                                                       |
| Gamification Conceptualization       |                                                                                                                     |                                                                                                                                                                   |                                                                                                                                               |                                                                                                                                                                                                                                                                       |
| Game Element                         | Description                                                                                                         | Do we use it? (Y/N)                                                                                                                                               | How do we use it?                                                                                                                             | Response                                                                                                                                                                                                                                                              |
| 1. Empowerment                       | Enable user to perceive that he/she can impact on the situation, have a sense of control                            | Y                                                                                                                                                                 | What are the decisions an empowered learner can take?                                                                                         | choose input methods which suit the learner best e.g. animated box on screen which once opened contains a video / a text doc / a podcast / an activity as the way to access the content                                                                               |
| 2. Smooth Learning Curves            | it keeps the user in continuous learning progress and in mastering his/her skills                                   |                                                                                                                                                                   | How can we smoothen learning curves for different learners?                                                                                   |                                                                                                                                                                                                                                                                       |
| 3. Communication Channels            | it enables communication via chats, forum, etc part of the game in which all players' actions take place until a    | Y                                                                                                                                                                 | Which communication channels are specifically needed?                                                                                         |                                                                                                                                                                                                                                                                       |
| 4. Levels                            | certain goal has been reached or an end condition has been fulfilled                                                | Y                                                                                                                                                                 | How do we distinguish different levels? What is specific for each level?                                                                      | quiz results to win keys for future boxes (see above)                                                                                                                                                                                                                 |
| 5. Clues                             | hints given to users to solve a problem and/or to achieve a goal and unblock the next level                         |                                                                                                                                                                   | How do we balance clues (not too many, not too few, informative without giving away too much information)?                                    |                                                                                                                                                                                                                                                                       |
| 6. Goal Indicators                   | Are indicators that explicit the goals                                                                              | Y                                                                                                                                                                 | Which goals can be selected/defined?                                                                                                          | intermediate goals achievable alone, and other goals which are only achievable as part of a team. There are also personal goals and community goals. Progress towards them displayed on a dashboard/map/graphic....                                                   |
| 7. Skills tree                       | Enable custom configurations of a character's abilities, often organised in branches                                | Y                                                                                                                                                                 | Which skills can we distinguish? How can we organise them in a hierarchy?                                                                     |                                                                                                                                                                                                                                                                       |
| 8. Guild                             | associations of players who chose to come together to achieve a common goal                                         |                                                                                                                                                                   | How can learners team up in guilds? What is the goal of each guild? How does it compete with other guilds?                                    |                                                                                                                                                                                                                                                                       |
| 9. Storytelling                      | the act of telling stories within the game                                                                          |                                                                                                                                                                   | Which story do we want to tell?                                                                                                               |                                                                                                                                                                                                                                                                       |
| 10. Stimulated Planning              | enable users to plan future action or goals therefore the strategy to follow to complete a level or the game itself |                                                                                                                                                                   | In a flipped MOOC how do you foresee the implementation of Stimulated Planning, a game elements that invite the users to plan their strategy? |                                                                                                                                                                                                                                                                       |
| Learning Analytics conceptualization |                                                                                                                     |                                                                                                                                                                   |                                                                                                                                               |                                                                                                                                                                                                                                                                       |
| For each game element selected:      |                                                                                                                     | Why do we use it?<br>For who?                                                                                                                                     |                                                                                                                                               | learning analytics, especially links clicked, time spent on steps, activities completed, interactions and communications made...can allow for PERSONALISATION of subsequent steps and tasks. This may be an effective response to engagement and retention issues...? |
|                                      |                                                                                                                     | How do we use it?/ how do you implement it?<br>What data do we need to support that?                                                                              |                                                                                                                                               | post-run analysis and reflection can greatly benefit from LA                                                                                                                                                                                                          |
| Design Phase                         |                                                                                                                     |                                                                                                                                                                   |                                                                                                                                               |                                                                                                                                                                                                                                                                       |
| Domain                               | educating for the future                                                                                            |                                                                                                                                                                   |                                                                                                                                               |                                                                                                                                                                                                                                                                       |
| Topic                                | engaging students in the 21st century                                                                               |                                                                                                                                                                   |                                                                                                                                               |                                                                                                                                                                                                                                                                       |
| Target group in mind                 | teacher training cohort + CPD                                                                                       |                                                                                                                                                                   |                                                                                                                                               |                                                                                                                                                                                                                                                                       |

CONNECTED: empowerment = choosing own learning goals : connects with goal indicators which are Personalised based on choices and learning analytics (see below) : connects with Learning Analytics which lead to link / step / learning path personalisation
