# Supplementary material
Source: MDPI journal article supplement (https://www.mdpi.com/2227-7102/8/1/25)
Supplement: s1 [file s1]

# MOOC: Dissertation writing

The recipe for a successful dissertation

Illustrative images used by  
participants removed from this  
material

# Recipe list (you will obtain badges each week)

- Flour - Research question
- Egg - Structure
- Sugar - Argument/critical thinking
- Icing - Formatting and presentation
- Chocolate chips - References/scholarship

Learners can select some or all of these ingredients

# Levels

## UG or PG

Users will have an option to select and the relevant materials will be made available accordingly

Note: This MOOC would allow users to select either one or more sessions to be completed. Certificate of completion would note which sessions were engaged with.

### **Data**

UG starters

PG starters

# Guild

‘associations of players who chose to come together to achieve a common goal’ = Group by subject. Forum discussion

## Data

Number of discussion threads

Number of replies / posts

# Assessment and Measuring learning analytics

- Starting survey - to find out about what the user is seeking. What are you after from this mooc? Is this your first dissertation? Level of knowledge already...
- Quizzes
- Self evaluations
- Questions/reflections - open text boxes

## Data

Number of completed quizzes  
(right / wrong answers)

Number of completed self  
evaluations

Information from evaluation

Trends from starting survey

# Goals

Main goal is to gain a good understanding of ‘what makes a successful dissertation’

Each sub-goal is achieved by the end of each session. At the end of the MOOC, the end goal would be measured by a checklist

## **Data**

Number of completed checklists  
Analysis of completed checklists  
Comparison of completion in  
terms of self-selection at the start

# Conclusion
